# Supplementary material for: Effects of FTMT Expression by Retinal Pigment Epithelial Cells on Features of Angiogenesis
Source: MDPI journal article supplement (doi:10.3390/ijms21103635), 2020-05-21
Supplement: s1 [file s1]

Supplementary Materials:

## Effects of FTMT Expression by Retinal Pigment Epithelial Cells on Features of Angiogenesis

Undral Buyandelger, Douglas G. Walker, Daijiro Yanagisawa, Toshifumi Morimura and Ikuo Tooyama \*

Molecular Neuroscience Research Center, Shiga University of Medical Science, Seta Tsukinowa-cho, Otsu, Shiga 520-2192, Japan; undral@belle.shiga-med.ac.jp (U.B.); walker@belle.shiga-med.ac.jp (D.G.W.); yanisagawa@belle.shiga-med.ac.jp (D.Y.); morimura@belle.shiga-med.ac.jp (T.M.)

\* Correspondence: kinchan@belle.shiga-med.ac.jp; Tel.: +81-77-548-2330; Fax: +81-77-548-2331

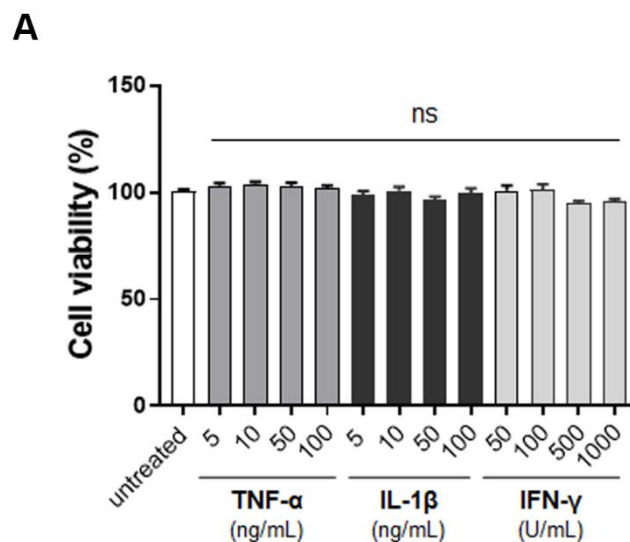

**Supplemental Figure S1. Cell viability assay to show effect of pro-inflammatory cytokines on ARPE-19 cells.**

ARPE-19 cells plated at  $1.5 \times 10^4$  cells/well in microtiter plate and were treated with indicated concentrations of pro-inflammatory cytokines for 24 hours followed by addition of Cell-Count Reagent (Nacalai-Tesque, Kyoto, Japan) (WST-8) for 4 hours. Absorbance recorded at 450 nm. Results represent mean  $\pm$  S.E.M. of 8 replicate wells/treatment. Data were analyzed by One-way ANOVA with Sidak's test (ns-non significant difference).

**A**

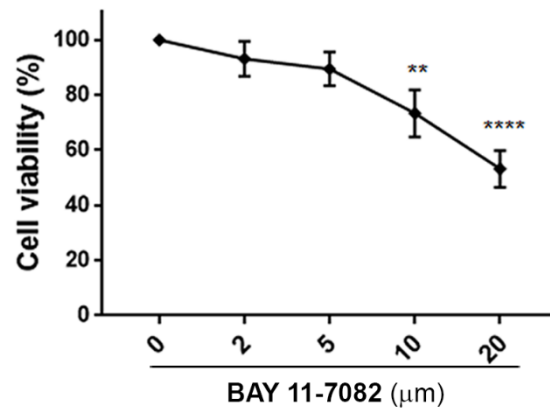

**Supplemental Figure S2. Cell viability assay to show effect of different concentrations of NF-κB inhibitor BAY 11-7082 on ARPE-19 cells.**

ARPE-19 cells plated at  $1.5 \times 10^4$  well in microtiter plate were treated with indicated concentrations of BAY 11-7082 for 24 hours followed by addition of Cell-Count Reagent (Nacalai-Tesque, Kyoto, Japan) (WST-8) for 4 hours. Absorbance recorded at 450 nm. Results represent mean  $\pm$  S.E.M. of 6 replicate wells/treatment. Data were analyzed by One-way ANOVA with Sidak's test (\*\*  $p < 0.01$ , \*\*\*\*  $p < 0.0001$ ,  $n = 6$ ).

**A**

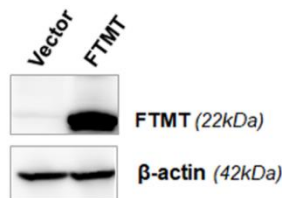

**B**

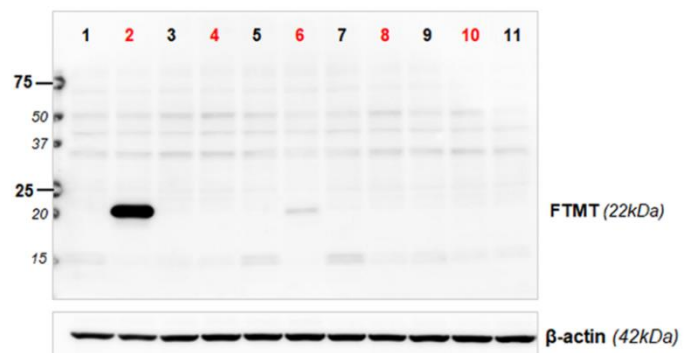

**Supplemental Figure S3. Western blot screening of FTMT transfected ARPE-19 cells.**

(A). Western blot showing expression of FTMT in transiently transfected cells (control vector and FTMT plasmid vector). Protein extracts from vector transfected and FTMT transfected cells were separated by SDS-PAGE and analyzed for expression of FTMT protein by western blot.

(B) Western blot screening of stably transfected ARPE-19 cells isolated after G418 selection. Protein extracts from vector transfected (black numbers) and FTMT transfected clones (red numbers) were separated by SDS-PAGE and analyzed for expression of FTMT protein by western blot. The highest expressing FTMT clone (2) was expanded.

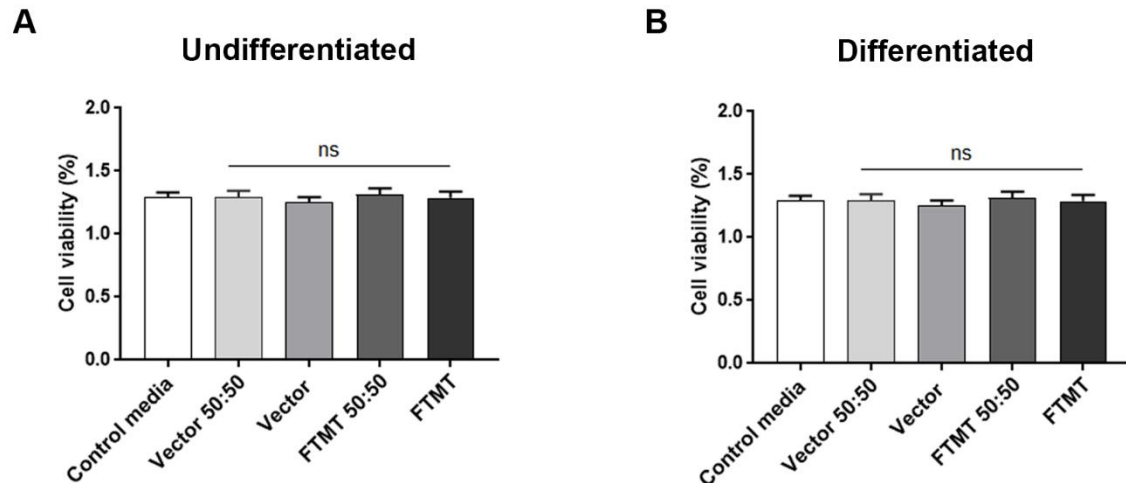

**Supplemental Figure S4. Cell viability assay to test for toxicity of FTMT-transfected and vector-transfected conditioned media on hCMEC/D3.**

hCMEC/D3 plated at  $1.5 \times 10^4$  well in microtiter plate were treated with indicated dilutions of conditioned media from vector and FTMT stably transfected ARPE-19 cells for 24 hours followed by addition of Cell-Count Reagent (WST-8) for 4 hours. Absorbance recorded at 450 nM. Results represent mean  $\pm$  S.E.M. of 6 replicate wells/treatment. Data were analyzed by One-way ANOVA (ns-non-significant differences)

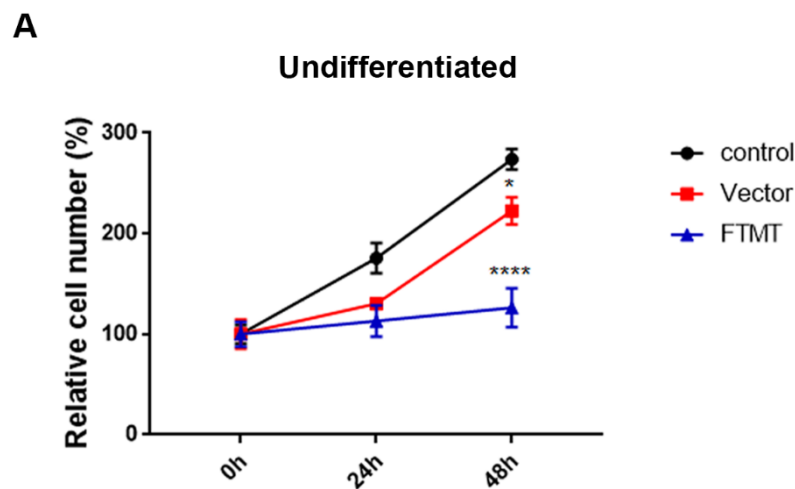

**Supplemental Figure S5. Effect of conditioned media from FTMT-transfected or vector-transfected ARPE-19 cells on cell proliferation of hCMEC/D3 endothelial cells.**

Effect of ARPE-19 conditioned media from undifferentiated ARPE-19 cells stably transfected with vector or FTMT plasmids. Conditioned media was diluted 1:1 with EC growth media. hCMEC/D3 cells were plated at  $2.5 \times 10^4$  cells/well on a 24-well tissue culture plate. After 6 hours to permit attachment, growth media was replaced with diluted conditioned media from Vector or FTMT-transfected ARPE-19 cells. Phase contrast images were obtained at 0 h, 24 h and 48 h and analyzed for percentage area of field occupied by cells using ImageJ analysis software. Data were analyzed by One-way ANOVA with Sidak's test (\*  $p < 0.05$ , \*\*\*\*  $p < 0.0001$ ,  $n = 4$ ).
